# Supplementary material for: Intramolecular OHO bonding in dibenzoylmethane: symmetry and spectral manifestations
Source: Royal Society of Chemistry journal article supplement (doi:10.1039/c4ra05586a), 2014-01-01
Supplement: c4ra05586a1.pdf [file c4ra05586a1.pdf]

# Intramolecular OHO Bonding in Dibenzoylmethane: Symmetry and Spectral Manifestations

Milena Petković and Mihajlo Etinski

## Supplementary Information

Selected structural parameters obtained at different levels of theory are compiled in Tables S1-S2.

Table S1: Selected bond lengths of the asymmetric structure in Å.

| bond                             | B3LYP/cc-pVDZ | M06-2X/cc-pVDZ | MP2/cc-pVDZ | B3LYP/cc-pVTZ | CC2/cc-pVTZ |
|----------------------------------|---------------|----------------|-------------|---------------|-------------|
| O <sub>1</sub> -H                | 1.029         | 1.025          | 1.014       | 1.014         | 1.039       |
| O <sub>1</sub> -C <sub>2</sub>   | 1.323         | 1.315          | 1.330       | 1.322         | 1.325       |
| C <sub>1</sub> -C <sub>2</sub>   | 1.386         | 1.379          | 1.385       | 1.376         | 1.384       |
| C <sub>1</sub> -C <sub>3</sub>   | 1.439         | 1.440          | 1.450       | 1.436         | 1.427       |
| C <sub>3</sub> -O <sub>2</sub>   | 1.261         | 1.249          | 1.258       | 1.253         | 1.275       |
| C <sub>3</sub> -C <sub>5</sub>   | 1.498         | 1.496          | 1.499       | 1.493         | 1.484       |
| C <sub>5</sub> -C <sub>11</sub>  | 1.406         | 1.399          | 1.411       | 1.398         | 1.401       |
| C <sub>11</sub> -C <sub>12</sub> | 1.396         | 1.393          | 1.404       | 1.388         | 1.393       |
| C <sub>12</sub> -C <sub>13</sub> | 1.398         | 1.394          | 1.406       | 1.390         | 1.396       |
| C <sub>13</sub> -C <sub>14</sub> | 1.399         | 1.396          | 1.407       | 1.392         | 1.397       |
| C <sub>14</sub> -C <sub>15</sub> | 1.394         | 1.391          | 1.402       | 1.386         | 1.392       |
| C <sub>5</sub> -C <sub>15</sub>  | 1.406         | 1.400          | 1.411       | 1.398         | 1.401       |
| C <sub>2</sub> -C <sub>4</sub>   | 1.482         | 1.482          | 1.481       | 1.475         | 1.469       |
| C <sub>4</sub> -C <sub>6</sub>   | 1.407         | 1.400          | 1.412       | 1.399         | 1.402       |
| C <sub>6</sub> -C <sub>7</sub>   | 1.395         | 1.392          | 1.403       | 1.387         | 1.392       |
| C <sub>7</sub> -C <sub>8</sub>   | 1.398         | 1.394          | 1.406       | 1.390         | 1.396       |
| C <sub>8</sub> -C <sub>9</sub>   | 1.399         | 1.395          | 1.406       | 1.391         | 1.396       |
| C <sub>9</sub> -C <sub>10</sub>  | 1.394         | 1.391          | 1.403       | 1.386         | 1.392       |
| C <sub>4</sub> -C <sub>10</sub>  | 1.407         | 1.401          | 1.412       | 1.399         | 1.402       |

Table S2: Selected bond lengths of the symmetric structure in Å.

| bond                            | B3LYP/cc-pVDZ | M06-2X/cc-pVDZ | MP2/cc-pVDZ | B3LYP/cc-pVTZ | CC2/cc-pVTZ |
|---------------------------------|---------------|----------------|-------------|---------------|-------------|
| O <sub>1</sub> -H               | 1.203         | 1.197          | 1.201       | 1.202         | 1.203       |
| O <sub>1</sub> -C <sub>2</sub>  | 1.291         | 1.281          | 1.291       | 1.287         | 1.296       |
| C <sub>1</sub> -C <sub>2</sub>  | 1.411         | 1.407          | 1.414       | 1.404         | 1.406       |
| C <sub>2</sub> -C <sub>4</sub>  | 1.487         | 1.487          | 1.488       | 1.482         | 1.481       |
| C <sub>4</sub> -C <sub>6</sub>  | 1.407         | 1.400          | 1.411       | 1.399         | 1.402       |
| C <sub>6</sub> -C <sub>7</sub>  | 1.394         | 1.391          | 1.402       | 1.387         | 1.393       |
| C <sub>7</sub> -C <sub>8</sub>  | 1.399         | 1.395          | 1.406       | 1.391         | 1.397       |
| C <sub>8</sub> -C <sub>9</sub>  | 1.399         | 1.395          | 1.406       | 1.391         | 1.397       |
| C <sub>9</sub> -C <sub>10</sub> | 1.395         | 1.392          | 1.403       | 1.387         | 1.394       |
| C <sub>4</sub> -C <sub>10</sub> | 1.406         | 1.400          | 1.411       | 1.399         | 1.402       |

Absolute values of cubic force constants larger than  $25 \text{ cm}^{-1}$  for the *A/S* species are given in Table /, and absolute values of quartic force constants larger than  $25 \text{ cm}^{-1}$  for the *A/S* species are given in Table /. For simplicity, mode numbering in ascending order is used instead of labels. for the *A* conformer, mode numbers 35, 58 and 70 correspond to  $\gamma_{\text{OH}}$ ,  $\delta_{\text{OH}}$  and  $\nu_{\text{OH}}$ , respectively. For the *S* conformer, mode numbers 1, 27, 53, 64, 66 and 70 correspond to  $\nu_{\text{OHO}}$ ,  $\nu_{\text{OO}}$ ,  $\gamma_{\text{HO}}$ ,  $\nu_{\text{CO}}$ ,  $\nu_{\text{CC}}$  and  $\delta_{\text{OHO}}$ , respectively.

Table S3: Absolute values of cubic anharmonic force constants of the *A* species (in  $\text{cm}^{-1}$ ) larger than  $25 \text{ cm}^{-1}$ .

|                |     |                |     |                |     |                |     |                |      |
|----------------|-----|----------------|-----|----------------|-----|----------------|-----|----------------|------|
| $K_{4,4,70}$   | 27  | $K_{35,21,70}$ | 46  | $K_{58,44,70}$ | 32  | $K_{66,55,70}$ | 52  | $K_{70,28,70}$ | 49   |
| $K_{5,4,70}$   | 29  | $K_{35,24,70}$ | 34  | $K_{58,56,70}$ | 57  | $K_{66,59,70}$ | 60  | $K_{70,32,70}$ | 229  |
| $K_{5,5,70}$   | 49  | $K_{35,25,70}$ | 174 | $K_{58,57,70}$ | 28  | $K_{66,61,70}$ | 40  | $K_{70,45,70}$ | 32   |
| $K_{6,4,70}$   | 26  | $K_{35,26,70}$ | 57  | $K_{58,58,70}$ | 180 | $K_{66,63,70}$ | 33  | $K_{70,50,70}$ | 37   |
| $K_{9,9,70}$   | 30  | $K_{35,29,70}$ | 102 | $K_{59,53,70}$ | 37  | $K_{66,64,70}$ | 58  | $K_{70,52,70}$ | 45   |
| $K_{10,9,70}$  | 45  | $K_{35,34,70}$ | 71  | $K_{59,55,70}$ | 42  | $K_{66,66,70}$ | 72  | $K_{70,53,70}$ | 222  |
| $K_{10,10,70}$ | 58  | $K_{35,35,70}$ | 989 | $K_{59,59,70}$ | 37  | $K_{68,66,70}$ | 31  | $K_{70,54,70}$ | 92   |
| $K_{15,9,70}$  | 31  | $K_{39,35,70}$ | 29  | $K_{60,58,70}$ | 26  | $K_{70,3,70}$  | 136 | $K_{70,55,70}$ | 288  |
| $K_{15,10,70}$ | 42  | $K_{53,53,70}$ | 26  | $K_{61,53,70}$ | 27  | $K_{70,6,70}$  | 35  | $K_{70,56,70}$ | 283  |
| $K_{16,9,70}$  | 29  | $K_{55,18,70}$ | 25  | $K_{61,55,70}$ | 31  | $K_{70,7,70}$  | 79  | $K_{70,57,70}$ | 82   |
| $K_{16,10,70}$ | 38  | $K_{55,53,70}$ | 29  | $K_{63,55,70}$ | 25  | $K_{70,8,70}$  | 47  | $K_{70,58,70}$ | 703  |
| $K_{16,15,70}$ | 29  | $K_{55,55,70}$ | 34  | $K_{64,18,70}$ | 31  | $K_{70,9,70}$  | 258 | $K_{70,59,70}$ | 184  |
| $K_{16,16,70}$ | 25  | $K_{56,9,70}$  | 27  | $K_{64,53,70}$ | 32  | $K_{70,10,70}$ | 419 | $K_{70,60,70}$ | 124  |
| $K_{25,25,70}$ | 30  | $K_{56,10,70}$ | 33  | $K_{64,55,70}$ | 36  | $K_{70,11,70}$ | 31  | $K_{70,61,70}$ | 66   |
| $K_{32,10,70}$ | 27  | $K_{56,15,70}$ | 25  | $K_{64,59,70}$ | 48  | $K_{70,12,70}$ | 32  | $K_{70,63,70}$ | 78   |
| $K_{35,2,70}$  | 43  | $K_{56,16,70}$ | 25  | $K_{64,61,70}$ | 35  | $K_{70,14,70}$ | 46  | $K_{70,64,70}$ | 195  |
| $K_{35,3,70}$  | 28  | $K_{58,3,70}$  | 37  | $K_{64,63,70}$ | 28  | $K_{70,15,70}$ | 285 | $K_{70,66,70}$ | 140  |
| $K_{35,4,70}$  | 46  | $K_{58,9,70}$  | 81  | $K_{64,64,70}$ | 43  | $K_{70,16,70}$ | 282 | $K_{70,68,70}$ | 77   |
| $K_{35,5,70}$  | 167 | $K_{58,10,70}$ | 110 | $K_{66,10,70}$ | 27  | $K_{70,17,70}$ | 53  | $K_{70,69,70}$ | 142  |
| $K_{35,6,70}$  | 73  | $K_{58,15,70}$ | 76  | $K_{66,18,70}$ | 38  | $K_{70,18,70}$ | 101 | $K_{70,70,70}$ | 2606 |
| $K_{35,7,70}$  | 78  | $K_{58,16,70}$ | 76  | $K_{66,32,70}$ | 27  | $K_{70,20,70}$ | 51  |                |      |
| $K_{35,15,70}$ | 63  | $K_{58,22,70}$ | 29  | $K_{66,53,70}$ | 44  | $K_{70,22,70}$ | 151 |                |      |
| $K_{35,16,70}$ | 49  | $K_{58,32,70}$ | 52  | $K_{66,54,70}$ | 31  | $K_{70,27,70}$ | 55  |                |      |

Table S4: Absolute values of cubic anharmonic force constants of the *S* species (in  $\text{cm}^{-1}$ ) larger than  $25 \text{ cm}^{-1}$ .

|              |     |               |     |               |     |               |     |               |     |
|--------------|-----|---------------|-----|---------------|-----|---------------|-----|---------------|-----|
| $K_{4,1,1}$  | 68  | $K_{35,1,1}$  | 298 | $K_{60,1,1}$  | 44  | $K_{65,61,1}$ | 27  | $K_{70,11,1}$ | 56  |
| $K_{10,1,1}$ | 93  | $K_{39,1,1}$  | 43  | $K_{62,1,1}$  | 43  | $K_{65,63,1}$ | 26  | $K_{70,15,1}$ | 55  |
| $K_{12,1,1}$ | 175 | $K_{45,1,1}$  | 59  | $K_{63,58,1}$ | 29  | $K_{65,64,1}$ | 34  | $K_{70,17,1}$ | 139 |
| $K_{13,1,1}$ | 29  | $K_{46,1,1}$  | 66  | $K_{64,12,1}$ | 47  | $K_{66,21,1}$ | 52  | $K_{70,18,1}$ | 45  |
| $K_{16,1,1}$ | 72  | $K_{50,1,1}$  | 26  | $K_{64,19,1}$ | 26  | $K_{66,26,1}$ | 30  | $K_{70,20,1}$ | 73  |
| $K_{19,1,1}$ | 81  | $K_{53,6,1}$  | 142 | $K_{64,21,1}$ | 105 | $K_{66,27,1}$ | 90  | $K_{70,28,1}$ | 60  |
| $K_{21,1,1}$ | 366 | $K_{53,7,1}$  | 74  | $K_{64,26,1}$ | 63  | $K_{66,35,1}$ | 35  | $K_{70,29,1}$ | 101 |
| $K_{22,5,1}$ | 36  | $K_{53,9,1}$  | 125 | $K_{64,27,1}$ | 183 | $K_{66,46,1}$ | 29  | $K_{70,52,1}$ | 32  |
| $K_{25,1,1}$ | 45  | $K_{53,15,1}$ | 44  | $K_{64,35,1}$ | 73  | $K_{66,58,1}$ | 44  | $K_{70,59,1}$ | 53  |
| $K_{26,1,1}$ | 189 | $K_{53,22,1}$ | 27  | $K_{64,45,1}$ | 52  | $K_{67,1,1}$  | 38  | $K_{70,64,1}$ | 206 |
| $K_{27,1,1}$ | 560 | $K_{58,1,1}$  | 177 | $K_{64,46,1}$ | 59  | $K_{69,27,1}$ | 36  | $K_{70,66,1}$ | 96  |
| $K_{27,7,1}$ | 26  | $K_{59,21,1}$ | 26  | $K_{64,58,1}$ | 94  | $K_{70,1,1}$  | 685 | $K_{70,69,1}$ | 44  |
| $K_{30,1,1}$ | 38  | $K_{59,27,1}$ | 45  | $K_{64,60,1}$ | 31  | $K_{70,7,1}$  | 106 |               |     |
| $K_{34,1,1}$ | 67  | $K_{59,58,1}$ | 27  | $K_{65,47,1}$ | 37  | $K_{70,9,1}$  | 57  |               |     |

Table S5: Absolute values of quartic anharmonic force constants of the A species (in  $\text{cm}^{-1}$ ) larger than  $25 \text{ cm}^{-1}$ .

|                   |     |                   |      |                   |    |                   |     |                   |     |
|-------------------|-----|-------------------|------|-------------------|----|-------------------|-----|-------------------|-----|
| $K_{1,1,70,70}$   | 252 | $K_{26,3,70,70}$  | 26   | $K_{48,2,70,70}$  | 32 | $K_{61,58,70,70}$ | 34  | $K_{68,55,70,70}$ | 35  |
| $K_{2,1,70,70}$   | 28  | $K_{26,6,70,70}$  | 33   | $K_{49,1,70,70}$  | 28 | $K_{61,59,70,70}$ | 30  | $K_{68,58,70,70}$ | 33  |
| $K_{2,2,70,70}$   | 245 | $K_{26,25,70,70}$ | 29   | $K_{49,2,70,70}$  | 57 | $K_{63,53,70,70}$ | 31  | $K_{68,59,70,70}$ | 31  |
| $K_{3,1,70,70}$   | 28  | $K_{29,4,70,70}$  | 35   | $K_{49,4,70,70}$  | 30 | $K_{63,55,70,70}$ | 39  | $K_{68,64,70,70}$ | 41  |
| $K_{3,3,70,70}$   | 55  | $K_{29,5,70,70}$  | 35   | $K_{50,2,70,70}$  | 36 | $K_{63,58,70,70}$ | 25  | $K_{68,66,70,70}$ | 48  |
| $K_{4,1,70,70}$   | 34  | $K_{33,1,70,70}$  | 34   | $K_{50,3,70,70}$  | 26 | $K_{63,59,70,70}$ | 28  | $K_{70,1,70,70}$  | 50  |
| $K_{5,1,70,70}$   | 66  | $K_{33,2,70,70}$  | 38   | $K_{51,2,70,70}$  | 48 | $K_{64,6,70,70}$  | 26  | $K_{70,3,70,70}$  | 38  |
| $K_{5,2,70,70}$   | 38  | $K_{34,4,70,70}$  | 28   | $K_{51,30,70,70}$ | 27 | $K_{64,7,70,70}$  | 32  | $K_{70,6,70,70}$  | 44  |
| $K_{5,4,70,70}$   | 32  | $K_{34,5,70,70}$  | 35   | $K_{52,1,70,70}$  | 38 | $K_{64,18,70,70}$ | 28  | $K_{70,7,70,70}$  | 37  |
| $K_{5,5,70,70}$   | 82  | $K_{34,6,70,70}$  | 25   | $K_{53,6,70,70}$  | 26 | $K_{64,32,70,70}$ | 34  | $K_{70,9,70,70}$  | 67  |
| $K_{6,1,70,70}$   | 66  | $K_{35,1,70,70}$  | 67   | $K_{53,7,70,70}$  | 28 | $K_{64,53,70,70}$ | 63  | $K_{70,10,70,70}$ | 132 |
| $K_{6,3,70,70}$   | 34  | $K_{35,2,70,70}$  | 70   | $K_{53,53,70,70}$ | 51 | $K_{64,54,70,70}$ | 39  | $K_{70,14,70,70}$ | 30  |
| $K_{6,4,70,70}$   | 75  | $K_{35,3,70,70}$  | 48   | $K_{54,53,70,70}$ | 30 | $K_{64,55,70,70}$ | 67  | $K_{70,15,70,70}$ | 103 |
| $K_{7,7,70,70}$   | 42  | $K_{35,4,70,70}$  | 148  | $K_{55,1,70,70}$  | 27 | $K_{64,56,70,70}$ | 34  | $K_{70,16,70,70}$ | 98  |
| $K_{8,8,70,70}$   | 31  | $K_{35,5,70,70}$  | 277  | $K_{55,6,70,70}$  | 25 | $K_{64,58,70,70}$ | 53  | $K_{70,18,70,70}$ | 66  |
| $K_{9,7,70,70}$   | 26  | $K_{35,6,70,70}$  | 117  | $K_{55,7,70,70}$  | 30 | $K_{64,59,70,70}$ | 67  | $K_{70,22,70,70}$ | 46  |
| $K_{10,4,70,70}$  | 25  | $K_{35,7,70,70}$  | 126  | $K_{55,32,70,70}$ | 26 | $K_{64,61,70,70}$ | 42  | $K_{70,28,70,70}$ | 30  |
| $K_{11,7,70,70}$  | 26  | $K_{35,8,70,70}$  | 44   | $K_{55,53,70,70}$ | 53 | $K_{64,63,70,70}$ | 41  | $K_{70,32,70,70}$ | 109 |
| $K_{12,1,70,70}$  | 45  | $K_{35,10,70,70}$ | 26   | $K_{55,54,70,70}$ | 35 | $K_{64,64,70,70}$ | 77  | $K_{70,35,70,70}$ | 42  |
| $K_{13,1,70,70}$  | 65  | $K_{35,15,70,70}$ | 77   | $K_{55,55,70,70}$ | 54 | $K_{66,6,70,70}$  | 26  | $K_{70,47,70,70}$ | 27  |
| $K_{14,1,70,70}$  | 41  | $K_{35,16,70,70}$ | 48   | $K_{56,1,70,70}$  | 46 | $K_{66,7,70,70}$  | 37  | $K_{70,50,70,70}$ | 37  |
| $K_{14,2,70,70}$  | 28  | $K_{35,24,70,70}$ | 33   | $K_{56,53,70,70}$ | 27 | $K_{66,10,70,70}$ | 31  | $K_{70,53,70,70}$ | 133 |
| $K_{15,3,70,70}$  | 33  | $K_{35,25,70,70}$ | 175  | $K_{56,55,70,70}$ | 31 | $K_{66,15,70,70}$ | 26  | $K_{70,54,70,70}$ | 66  |
| $K_{15,7,70,70}$  | 27  | $K_{35,26,70,70}$ | 46   | $K_{57,2,70,70}$  | 26 | $K_{66,18,70,70}$ | 32  | $K_{70,55,70,70}$ | 168 |
| $K_{16,1,70,70}$  | 52  | $K_{35,29,70,70}$ | 108  | $K_{57,4,70,70}$  | 35 | $K_{66,22,70,70}$ | 27  | $K_{70,56,70,70}$ | 125 |
| $K_{16,2,70,70}$  | 35  | $K_{35,34,70,70}$ | 82   | $K_{58,2,70,70}$  | 33 | $K_{66,32,70,70}$ | 42  | $K_{70,58,70,70}$ | 241 |
| $K_{17,1,70,70}$  | 33  | $K_{35,35,70,70}$ | 1071 | $K_{58,53,70,70}$ | 41 | $K_{66,45,70,70}$ | 32  | $K_{70,59,70,70}$ | 140 |
| $K_{17,2,70,70}$  | 28  | $K_{37,1,70,70}$  | 46   | $K_{58,54,70,70}$ | 29 | $K_{66,47,70,70}$ | 26  | $K_{70,60,70,70}$ | 58  |
| $K_{17,5,70,70}$  | 31  | $K_{38,1,70,70}$  | 31   | $K_{58,55,70,70}$ | 45 | $K_{66,53,70,70}$ | 81  | $K_{70,61,70,70}$ | 77  |
| $K_{20,1,70,70}$  | 39  | $K_{39,1,70,70}$  | 30   | $K_{58,58,70,70}$ | 25 | $K_{66,54,70,70}$ | 46  | $K_{70,62,70,70}$ | 25  |
| $K_{22,2,70,70}$  | 35  | $K_{39,2,70,70}$  | 30   | $K_{59,7,70,70}$  | 27 | $K_{66,55,70,70}$ | 83  | $K_{70,63,70,70}$ | 72  |
| $K_{23,1,70,70}$  | 34  | $K_{40,1,70,70}$  | 26   | $K_{59,32,70,70}$ | 31 | $K_{66,56,70,70}$ | 37  | $K_{70,64,70,70}$ | 164 |
| $K_{23,2,70,70}$  | 57  | $K_{40,2,70,70}$  | 34   | $K_{59,45,70,70}$ | 31 | $K_{66,58,70,70}$ | 72  | $K_{70,65,70,70}$ | 38  |
| $K_{24,2,70,70}$  | 70  | $K_{42,1,70,70}$  | 40   | $K_{59,53,70,70}$ | 51 | $K_{66,59,70,70}$ | 73  | $K_{70,66,70,70}$ | 174 |
| $K_{25,1,70,70}$  | 27  | $K_{43,1,70,70}$  | 28   | $K_{59,54,70,70}$ | 30 | $K_{66,61,70,70}$ | 52  | $K_{70,68,70,70}$ | 70  |
| $K_{25,4,70,70}$  | 42  | $K_{44,2,70,70}$  | 39   | $K_{59,55,70,70}$ | 58 | $K_{66,62,70,70}$ | 29  | $K_{70,69,70,70}$ | 42  |
| $K_{25,6,70,70}$  | 31  | $K_{45,1,70,70}$  | 42   | $K_{59,58,70,70}$ | 46 | $K_{66,63,70,70}$ | 49  | $K_{70,70,70,70}$ | 490 |
| $K_{25,7,70,70}$  | 46  | $K_{46,2,70,70}$  | 39   | $K_{59,59,70,70}$ | 46 | $K_{66,64,70,70}$ | 99  | $K_{73,1,70,70}$  | 31  |
| $K_{25,25,70,70}$ | 68  | $K_{46,4,70,70}$  | 30   | $K_{61,53,70,70}$ | 34 | $K_{66,66,70,70}$ | 118 | $K_{75,3,70,70}$  | 38  |
| $K_{26,1,70,70}$  | 72  | $K_{46,30,70,70}$ | 26   | $K_{61,55,70,70}$ | 36 | $K_{68,53,70,70}$ | 34  | $K_{81,4,70,70}$  | 36  |

Table S6: Absolute values of quartic anharmonic force constants of the  $S$  species (in  $\text{cm}^{-1}$ ) larger than  $25 \text{ cm}^{-1}$ .

|                |      |                 |     |                 |     |                 |      |                 |     |
|----------------|------|-----------------|-----|-----------------|-----|-----------------|------|-----------------|-----|
| $K_{1,1,1,1}$  | 7789 | $K_{16,4,1,1}$  | 44  | $K_{33,14,1,1}$ | 30  | $K_{53,30,1,1}$ | 64   | $K_{66,7,1,1}$  | 62  |
| $K_{2,1,1,1}$  | 82   | $K_{16,10,1,1}$ | 35  | $K_{34,3,1,1}$  | 103 | $K_{53,53,1,1}$ | 650  | $K_{66,9,1,1}$  | 27  |
| $K_{2,2,1,1}$  | 323  | $K_{17,1,1,1}$  | 369 | $K_{34,4,1,1}$  | 57  | $K_{54,53,1,1}$ | 27   | $K_{66,11,1,1}$ | 30  |
| $K_{3,3,1,1}$  | 108  | $K_{17,2,1,1}$  | 67  | $K_{34,10,1,1}$ | 41  | $K_{55,1,1,1}$  | 83   | $K_{66,15,1,1}$ | 33  |
| $K_{4,2,1,1}$  | 30   | $K_{18,2,1,1}$  | 36  | $K_{34,13,1,1}$ | 31  | $K_{55,2,1,1}$  | 27   | $K_{66,17,1,1}$ | 49  |
| $K_{4,3,1,1}$  | 133  | $K_{19,5,1,1}$  | 28  | $K_{34,27,1,1}$ | 27  | $K_{57,1,1,1}$  | 114  | $K_{66,20,1,1}$ | 26  |
| $K_{4,4,1,1}$  | 75   | $K_{20,1,1,1}$  | 231 | $K_{35,5,1,1}$  | 27  | $K_{57,7,1,1}$  | 31   | $K_{66,44,1,1}$ | 37  |
| $K_{5,2,1,1}$  | 101  | $K_{22,1,1,1}$  | 28  | $K_{35,27,1,1}$ | 30  | $K_{58,4,1,1}$  | 27   | $K_{66,59,1,1}$ | 49  |
| $K_{5,3,1,1}$  | 138  | $K_{23,16,1,1}$ | 27  | $K_{36,2,1,1}$  | 32  | $K_{58,21,1,1}$ | 33   | $K_{66,63,1,1}$ | 37  |
| $K_{5,5,1,1}$  | 26   | $K_{24,1,1,1}$  | 34  | $K_{36,24,1,1}$ | 31  | $K_{58,26,1,1}$ | 30   | $K_{66,64,1,1}$ | 206 |
| $K_{6,1,1,1}$  | 55   | $K_{24,2,1,1}$  | 45  | $K_{37,2,1,1}$  | 39  | $K_{58,27,1,1}$ | 37   | $K_{66,66,1,1}$ | 99  |
| $K_{6,6,1,1}$  | 29   | $K_{24,9,1,1}$  | 27  | $K_{37,3,1,1}$  | 43  | $K_{59,1,1,1}$  | 466  | $K_{69,1,1,1}$  | 335 |
| $K_{7,1,1,1}$  | 537  | $K_{24,15,1,1}$ | 26  | $K_{37,4,1,1}$  | 60  | $K_{59,7,1,1}$  | 43   | $K_{69,7,1,1}$  | 25  |
| $K_{7,3,1,1}$  | 39   | $K_{24,17,1,1}$ | 26  | $K_{37,5,1,1}$  | 50  | $K_{59,17,1,1}$ | 30   | $K_{69,64,1,1}$ | 81  |
| $K_{7,7,1,1}$  | 48   | $K_{25,2,1,1}$  | 46  | $K_{37,23,1,1}$ | 29  | $K_{59,59,1,1}$ | 29   | $K_{69,66,1,1}$ | 42  |
| $K_{8,3,1,1}$  | 89   | $K_{25,3,1,1}$  | 44  | $K_{42,3,1,1}$  | 33  | $K_{60,3,1,1}$  | 30   | $K_{70,3,1,1}$  | 35  |
| $K_{8,4,1,1}$  | 69   | $K_{25,5,1,1}$  | 27  | $K_{42,5,1,1}$  | 52  | $K_{61,1,1,1}$  | 57   | $K_{70,4,1,1}$  | 40  |
| $K_{8,5,1,1}$  | 55   | $K_{25,23,1,1}$ | 27  | $K_{43,2,1,1}$  | 65  | $K_{61,2,1,1}$  | 38   | $K_{70,10,1,1}$ | 58  |
| $K_{9,1,1,1}$  | 197  | $K_{26,3,1,1}$  | 84  | $K_{44,1,1,1}$  | 226 | $K_{62,3,1,1}$  | 27   | $K_{70,12,1,1}$ | 52  |
| $K_{9,2,1,1}$  | 47   | $K_{26,4,1,1}$  | 37  | $K_{46,3,1,1}$  | 26  | $K_{62,5,1,1}$  | 29   | $K_{70,16,1,1}$ | 45  |
| $K_{9,6,1,1}$  | 33   | $K_{26,8,1,1}$  | 30  | $K_{46,4,1,1}$  | 40  | $K_{63,1,1,1}$  | 225  | $K_{70,19,1,1}$ | 30  |
| $K_{9,7,1,1}$  | 36   | $K_{26,10,1,1}$ | 36  | $K_{46,5,1,1}$  | 57  | $K_{63,2,1,1}$  | 35   | $K_{70,21,1,1}$ | 133 |
| $K_{9,9,1,1}$  | 43   | $K_{27,3,1,1}$  | 26  | $K_{47,1,1,1}$  | 156 | $K_{64,1,1,1}$  | 1773 | $K_{70,26,1,1}$ | 66  |
| $K_{10,5,1,1}$ | 63   | $K_{27,5,1,1}$  | 40  | $K_{47,2,1,1}$  | 48  | $K_{64,7,1,1}$  | 146  | $K_{70,27,1,1}$ | 199 |
| $K_{11,1,1,1}$ | 235  | $K_{27,27,1,1}$ | 58  | $K_{48,7,1,1}$  | 29  | $K_{64,9,1,1}$  | 50   | $K_{70,34,1,1}$ | 30  |
| $K_{11,2,1,1}$ | 77   | $K_{28,1,1,1}$  | 138 | $K_{49,10,1,1}$ | 31  | $K_{64,11,1,1}$ | 48   | $K_{70,35,1,1}$ | 77  |
| $K_{12,3,1,1}$ | 33   | $K_{29,1,1,1}$  | 161 | $K_{49,23,1,1}$ | 25  | $K_{64,15,1,1}$ | 56   | $K_{70,42,1,1}$ | 27  |
| $K_{12,5,1,1}$ | 43   | $K_{29,2,1,1}$  | 30  | $K_{50,5,1,1}$  | 37  | $K_{64,17,1,1}$ | 98   | $K_{70,50,1,1}$ | 28  |
| $K_{13,2,1,1}$ | 42   | $K_{30,3,1,1}$  | 51  | $K_{51,2,1,1}$  | 29  | $K_{64,20,1,1}$ | 58   | $K_{70,53,1,1}$ | 51  |
| $K_{13,3,1,1}$ | 82   | $K_{30,4,1,1}$  | 42  | $K_{52,2,1,1}$  | 62  | $K_{64,28,1,1}$ | 40   | $K_{70,70,1,1}$ | 92  |
| $K_{13,4,1,1}$ | 28   | $K_{30,5,1,1}$  | 29  | $K_{53,3,1,1}$  | 85  | $K_{64,29,1,1}$ | 42   | $K_{78,1,1,1}$  | 28  |
| $K_{14,1,1,1}$ | 32   | $K_{30,8,1,1}$  | 31  | $K_{53,5,1,1}$  | 37  | $K_{64,44,1,1}$ | 54   | $K_{80,3,1,1}$  | 48  |
| $K_{14,2,1,1}$ | 60   | $K_{31,2,1,1}$  | 59  | $K_{53,8,1,1}$  | 93  | $K_{64,47,1,1}$ | 32   | $K_{81,3,1,1}$  | 57  |
| $K_{14,3,1,1}$ | 49   | $K_{31,5,1,1}$  | 26  | $K_{53,12,1,1}$ | 36  | $K_{64,59,1,1}$ | 125  | $K_{81,81,1,1}$ | 26  |
| $K_{14,6,1,1}$ | 34   | $K_{31,11,1,1}$ | 29  | $K_{53,16,1,1}$ | 34  | $K_{64,61,1,1}$ | 31   |                 |     |
| $K_{15,1,1,1}$ | 217  | $K_{32,3,1,1}$  | 50  | $K_{53,23,1,1}$ | 37  | $K_{64,63,1,1}$ | 78   |                 |     |
| $K_{15,2,1,1}$ | 130  | $K_{32,4,1,1}$  | 26  | $K_{53,25,1,1}$ | 74  | $K_{64,64,1,1}$ | 433  |                 |     |
| $K_{16,3,1,1}$ | 90   | $K_{33,2,1,1}$  | 102 | $K_{53,27,1,1}$ | 26  | $K_{66,1,1,1}$  | 866  |                 |     |

Bond critical points (3,-1) are depicted of Figure S1.

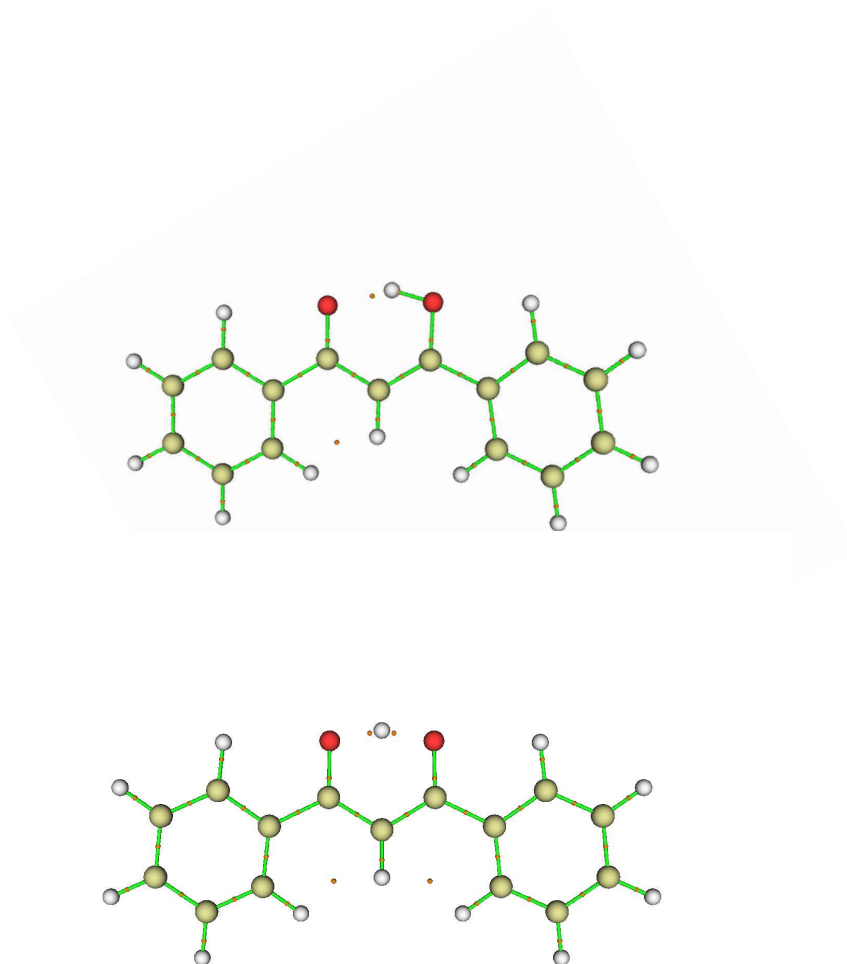

Figure S1: The asymmetric and the symmetric structure of DBM: orange circles represent (3,-1) bond critical points.

Selected normal mode displacements are shown on Figure S2.

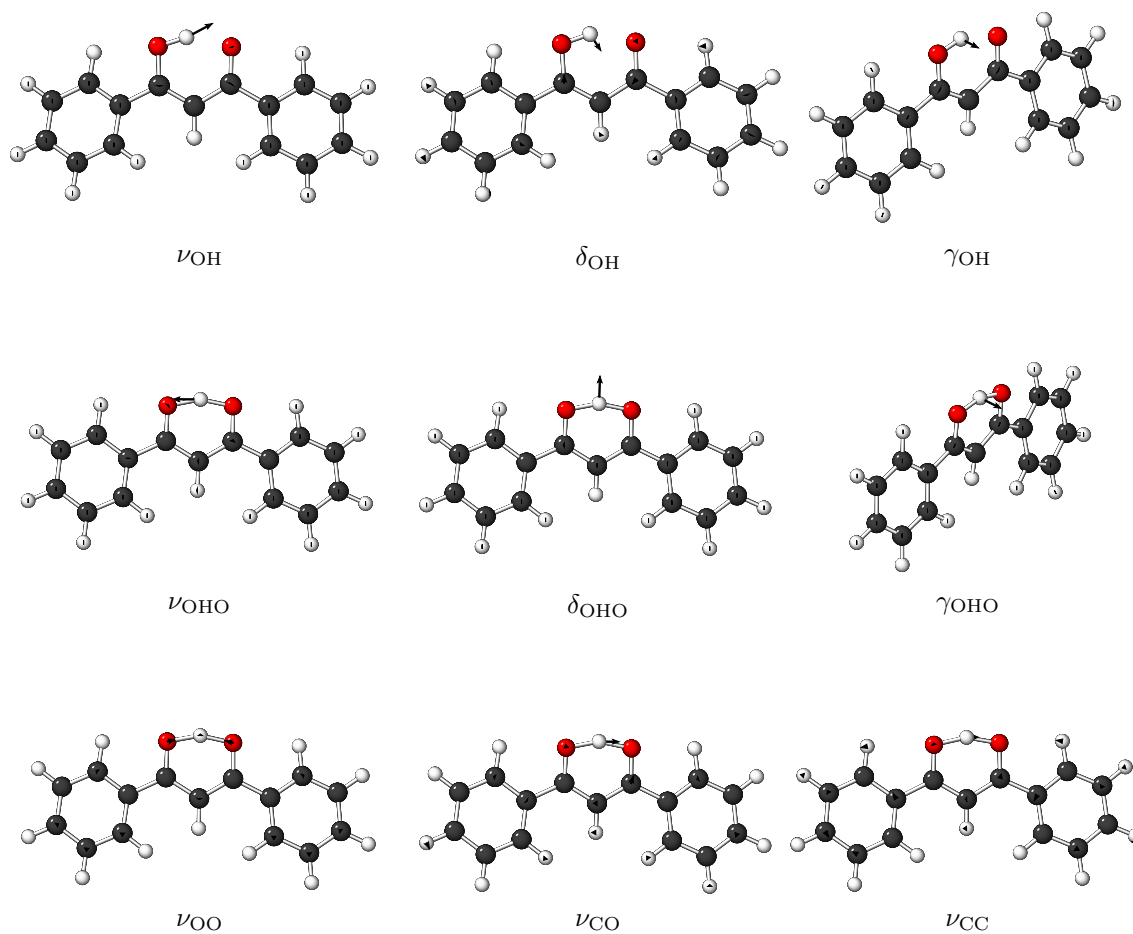

Figure S2: Normal mode vibrations of the two conformers:  $\nu_{\text{OH}}$  and  $\nu_{\text{OHO}}^a$  modes, as well as modes coupled to them.
